# Supplementary material for: Inverted energy gap law for the nonradiative decay in fluorescent floppy molecules: larger fluorescence quantum yields for smaller energy gaps
Source: Royal Society of Chemistry journal article supplement (doi:10.1039/c9qo00259f), 2019-01-01
Supplement: c9qo00259f2.pdf [file c9qo00259f2.pdf]

There is only one additional supplementary information file available for this article.
